# Supplementary material for: Molecular and Clinical Characterization of Chikungunya Virus Infections in Southeast Mexico
Source: PubMed Central journal article supplement (PMC5977241; doi:10.3390/v10050248), 2018-05-09
Supplement: viruses-10-00248-s001.pdf [file viruses-10-00248-s001.pdf]

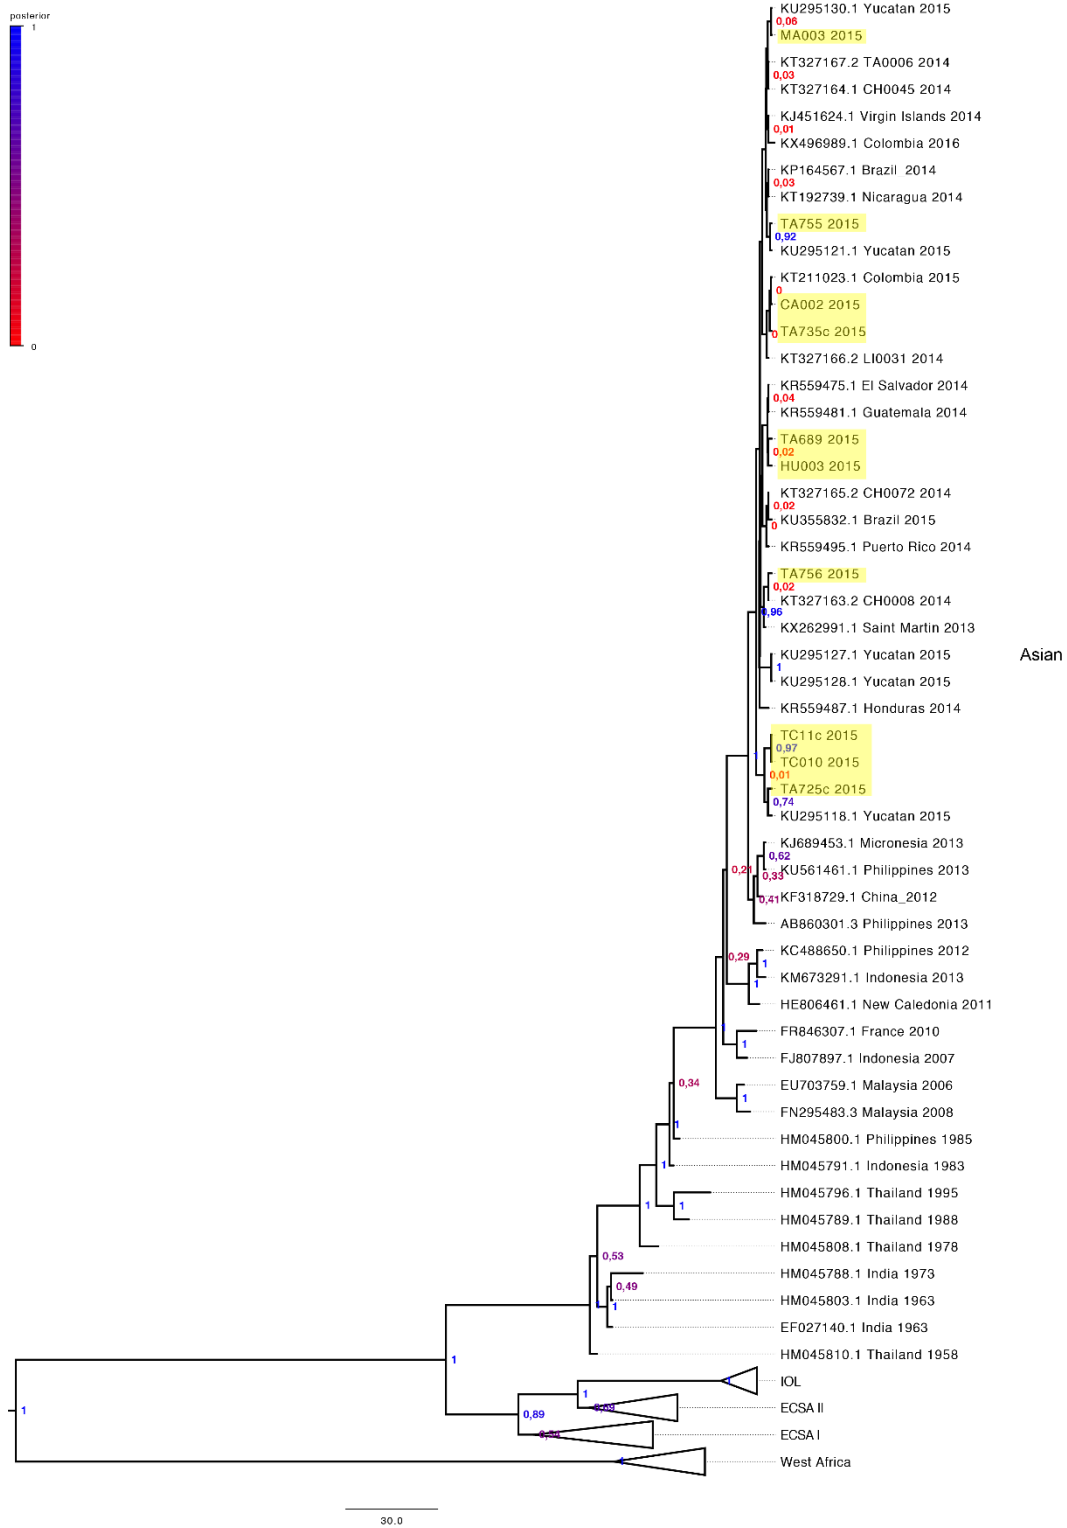

**Figure S1.** Maximum clade credibility (MCC) phylogeny based on the E1 gene of 73 CHIKV sequences. The four CHIKV lineages are shown. Sequences obtained from this study are highlighted in yellow. Nodes correspond to posterior probabilities.

**Table S1.** Chikungunya virus strains used in this study

| <b>Name</b>        | <b>Accession number</b> | <b>Strain name</b>     | <b>Year of isolation</b> | <b>State/Country of isolation</b> | <b>Lineage</b> |
|--------------------|-------------------------|------------------------|--------------------------|-----------------------------------|----------------|
| Philippines 2013   | AB860301.3              | CHIKV-13-112A          | 2013                     | Philippines                       | Asian          |
| Tanzania 1953      | AF369024.2              | S-27 African prototype | 1953                     | Tanzania                          | ECSA I         |
| Senegal 1983       | AY726732.1              | 37997                  | 1983                     | Senegal                           | West Africa    |
| La Reunion 2006    | DQ443544.2              | LR2006_OPY1            | 2006                     | La Réunion                        | IOL            |
| India 1963         | EF027140.1              | IND-63-WB1             | 1963                     | India                             | Asian          |
| Italy 2007         | EU244823.2              | ITA07-RA1              | 2007                     | Italy                             | IOL            |
| Malaysia 2006      | EU703759.1              | MY002IMR/06/BP         | 2006                     | Malaysia                          | Asian          |
| Singapore 2008     | FJ445510.2              | SGEHICHS277108         | 2008                     | Singapore                         | IOL            |
| Malaysia 2009      | FJ807895.1              | 0901aTw                | 2009                     | Malaysia                          | IOL            |
| Indonesia 2007     | FJ807897.1              | 0706aTw                | 2007                     | Indonesia                         | Asian          |
| Malaysia 2008      | FN295483.3              | MY/06/37348            | 2008                     | Malaysia                          | Asian          |
| France 2010        | FR846307.1              | Pt11352                | 2010                     | France                            | Asian          |
| China 2008         | GU199351.1              | SD08Pan                | 2008                     | China                             | IOL            |
| Thailand 2009      | GU301781.1              | CHU-Chik683            | 2009                     | Thailand                          | IOL            |
| New Caledonia 2011 | HE806461.1              | NC/2011-568            | 2011                     | New Caledonia                     | Asian          |
| C.A.R 1984         | HM045784.1              | DakAR B 16878          | 1984                     | Central African Republic          | ECSA II        |
| India 1973         | HM045788.1              | PO731460               | 1973                     | India                             | Asian          |
| Thailand 1988      | HM045789.1              | 6441-88                | 1988                     | Thailand                          | Asian          |
| Indonesia 1983     | HM045791.1              | JKT23574               | 1983                     | Indonesia                         | Asian          |
| South Africa 1956  | HM045792.1              | Vereeniging            | 1956                     | South Africa                      | ECSA I         |
| Thailand 1995      | HM045796.1              | CO392-95               | 1995                     | Thailand                          | Asian          |
| Philippines 1985   | HM045800.1              | Hu/85/NR001            | 1985                     | Philippines                       | Asian          |

|                     |            |                 |      |                          |             |
|---------------------|------------|-----------------|------|--------------------------|-------------|
| Sri Lanka 2007      | HM045801.1 | SL-CK1          | 2007 | Sri Lanka                | IOL         |
| India 1963          | HM045803.1 | I-634029        | 1963 | India                    | Asian       |
| South Africa 1976   | HM045805.1 | AR 18211        | 1976 | South Africa             | ECSA I      |
| Nigeria 1965        | HM045807.1 | IbAn4824        | 1965 | Nigeria                  | West Africa |
| Thailand 1978       | HM045808.1 | 3412-78         | 1978 | Thailand                 | Asian       |
| Congo 1960          | HM045809.1 | LSFS            | 1960 | Congo                    | ECSA I      |
| Thailand 1958       | HM045810.1 | TH35            | 1958 | Thailand                 | Asian       |
| Uganda 1982         | HM045812.1 | UgAg4155        | 1982 | Uganda                   | ECSA II     |
| Ivory Coast 1993    | HM045820.1 | ArA 30548       | 1993 | Ivory Coast              | West Africa |
| C.A.R. 1978         | HM045822.1 | HB78            | 1978 | Central African Republic | ECSA II     |
| Angola 1962         | HM045823.1 | Angola M2022    | 1962 | Angola                   | ECSA II     |
| India 2010          | HM159387.1 | TN06210         | 2010 | India                    | IOL         |
| Kenya 2004          | HQ456255.1 | Lamu33          | 2004 | Kenya                    | IOL         |
| India 2006          | JF274082.1 | IND-06-Guj      | 2016 | India                    | IOL         |
| Philippines 2012    | KC488650.1 | CHIKV-JC2012    | 2012 | Philippines              | Asian       |
| Indonesia 2010      | KC862329.1 | NL10/152        | 2010 | Indonesia                | IOL         |
| China 2012          | KF318729.1 | chik-sy         | 2012 | China                    | Asian       |
| Virgin Islands 2014 | KJ451624.1 | 99659           | 2014 | Virgin Islands           | Asian       |
| Micronesia 2013     | KJ689453.1 | Yap 13-2148     | 2013 | Micronesia               | Asian       |
| Indonesia 2013      | KM673291.1 | DH130003        | 2013 | Indonesia                | Asian       |
| Brazil 2014         | KP164567.1 | AMA2798/H804298 | 2014 | Brazil                   | Asian       |
| El Salvador 2014    | KR559475.1 | WHCHK6          | 2014 | El Salvador              | Asian       |
| Guatemala 2014      | KR559481.1 | WHCHK12         | 2014 | Guatemala                | Asian       |
| Honduras 2014       | KR559487.1 | WHCHK18         | 2014 | Honduras                 | Asian       |
| Puerto Rico 2014    | KR559495.1 | WHCHK26         | 2014 | Puerto Rico              | Asian       |

|                   |            |                                                   |      |                |       |
|-------------------|------------|---------------------------------------------------|------|----------------|-------|
| Nicaragua 2014    | KT192739.1 | 7050                                              | 2014 | Nicaragua      | Asian |
| Colombia 2015     | KT211023.1 | 440191                                            | 2015 | Colombia       | Asian |
| CH0008 2014       | KT327163.2 | CH0008                                            | 2014 | Chiapas/Mexico | Asian |
| CH0045 2014       | KT327164.1 | CH0045                                            | 2014 | Chiapas/Mexico | Asian |
| CH0072 2014       | KT327165.2 | CH0072                                            | 2014 | Chiapas/Mexico | Asian |
| LI0031 2014       | KT327166.2 | LI0031                                            | 2014 | Chiapas/Mexico | Asian |
| TA0006            | KT327167.2 | TA0006                                            | 2014 | Chiapas/Mexico | Asian |
| Yucatan 2015      | KU295118.1 | YUC-M16                                           | 2015 | Yucatan/Mexico | Asian |
| Yucatan 2015      | KU295121.1 | YUC-A36                                           | 2015 | Yucatan/Mexico | Asian |
| Yucatan 2015      | KU295127.1 | YUC-A30                                           | 2015 | Yucatan/Mexico | Asian |
| Yucatan 2015      | KU295128.1 | YUC-A15                                           | 2015 | Yucatan/Mexico | Asian |
| Yucatan 2015      | KU295130.1 | YUC-A7                                            | 2015 | Yucatan/Mexico | Asian |
| Brazil 2015       | KU355832.1 | RJ/CHIKV/2015                                     | 2015 | Brazil         | Asian |
| Philippines 2013  | KU561461.1 | 1308aTw                                           | 2013 | Philippines    | Asian |
| Saint Martin 2013 | KX262991.1 | CHIKV/Homo sapiens/SXM/H-20235-STMARTIN-2013/2003 | 2013 | Saint Martin   | Asian |
| Colombia 2016     | KX496989.1 | Homo sapiens/COL/UF-1/2016                        | 2016 | Colombia       | Asian |

---

ECSA I, East Central South Africa I; ECSA II, East Central South Africa II; IOL, Indian Ocean lineage.
